# Supplementary material for: Measurement Report: Hygroscopicity and mixing state of submicron aerosols in the lower free troposphere over central China：local, regional and long-range transport influences
Source: Copernicus journal article supplement (doi:10.5194/egusphere-2025-2643), 2025-07-10
Supplement: Supplementary file 1 [file egusphere-2025-2643-supplement.pdf]

## *Supplement of*

# **Measurement Report: Hygroscopicity and mixing state of submicron aerosols in the lower free troposphere over central China: local, regional and long-range transport influences**

Jingnan Shi<sup>1,★</sup>, Zhisheng Zhang<sup>2,★</sup>, Li Li<sup>3</sup>, Li Liu<sup>4, #</sup>, Yaqing Zhou<sup>5,6</sup>, Shuang Han<sup>7</sup>, Shaobin Zhang<sup>5,6</sup>, Minghua Liang<sup>5,6</sup>, Linhong Xie<sup>5,6</sup>, Weikang Ran<sup>3</sup>, Shaowen Zhu<sup>5,6</sup>, Hanbing Xu<sup>8</sup>, Jiangchuan Tao<sup>5,6</sup>, Alfred Wiedensohler<sup>9</sup>, Qiaoqiao Wang<sup>5,6</sup>, Qiyuan Wang<sup>3</sup>, Nan Ma<sup>5,6</sup>, Juan Hong<sup>5,6, #</sup>

<sup>1</sup>Institute of Facility Agriculture of Guangdong Academy of Agricultural Sciences, Guangzhou, 510640, China

<sup>2</sup>Guangdong Provincial Key Laboratory of Water and Air Pollution Control, South China Institute of Environmental Science, Ministry of Ecology and Environment, Guangzhou, 510655, China

<sup>3</sup>State Key Laboratory of Loess and Quaternary Geology, Key Lab of Aerosol Chemistry and Physics, Institute of Earth Environment, Chinese Academy of Sciences, Xi'an, 710061, China

<sup>4</sup>Guangzhou Institute of Tropical and Marine Meteorology of China Meteorological Administration, GBA Academy of Meteorological Research, Guangzhou, 510640, China

<sup>5</sup>Institute for Environmental and Climate Research, Jinan University, Guangzhou, 511443, China

<sup>6</sup>Guangdong-Hongkong-Macau Joint Laboratory of Collaborative Innovation for Environmental Quality, Guangzhou, 511443, China

<sup>7</sup>Department of Geography, College of Science, Qiqihar University, Qiqihar 161006, China

<sup>8</sup>School of Computer Science and Engineering, Sun Yat-Sen University, Guangzhou, 510006, China

<sup>9</sup>Institute for Tropospheric Research, Permoserstr. 15, Leipzig, 04318, Germany

★These authors contributed equally to this work.

Correspondence to: Juan Hong ([juanhong0108@jnu.edu.cn](mailto:juanhong0108@jnu.edu.cn)) and Li Liu ([liul@gd121.cn](mailto:liul@gd121.cn))

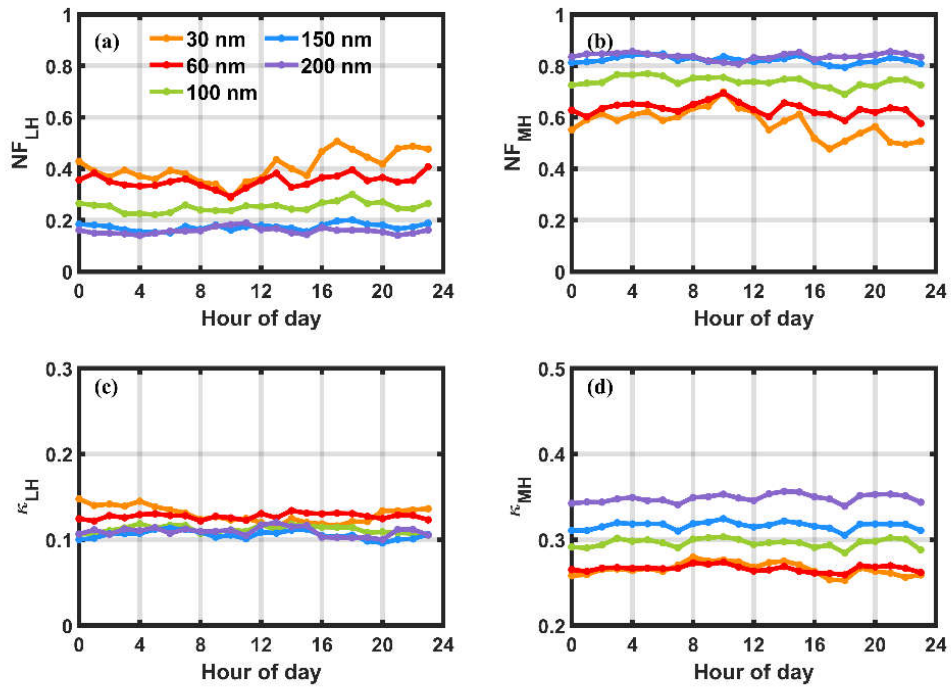

Figure S1. Diurnal variation of the number fractions and individual  $\kappa$  of LH and MH mode particles under the entire campaign.

30

35

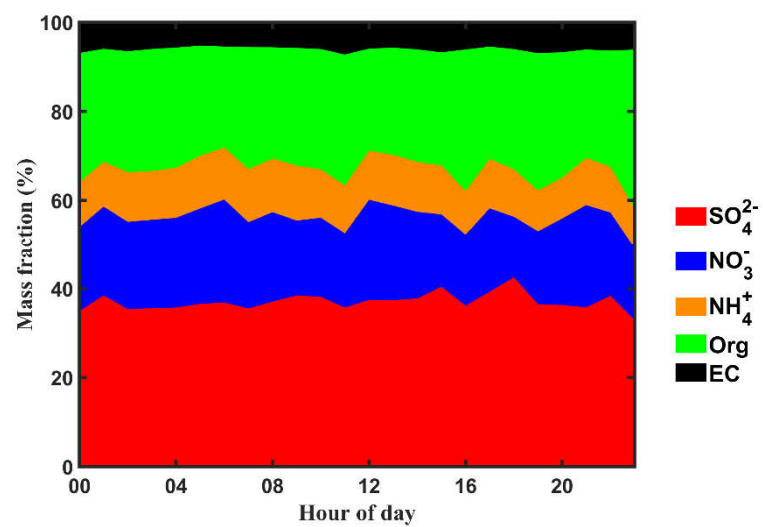

Figure S2. Diurnal variation of average proportions of different chemical components.

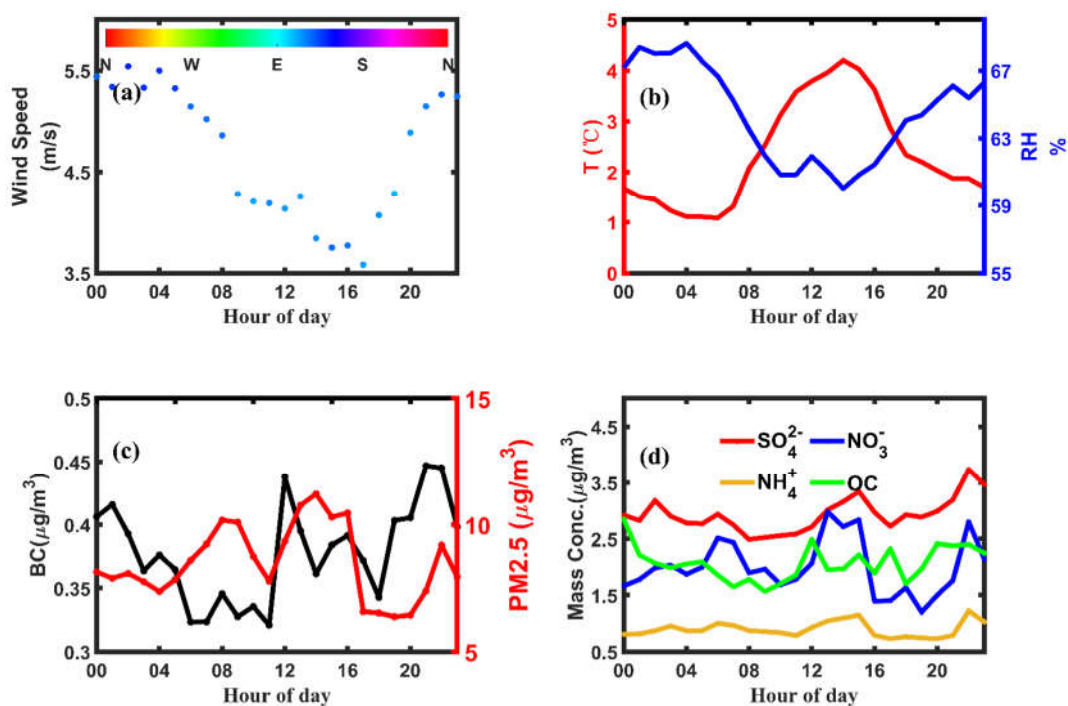

45 Figure S3. Diurnal variation of (a) wind speed and direction, (b) relative humidity and ambient temperature, (c) BC and PM<sub>2.5</sub> mass concentrations, (d) and the mass concentrations of chemical components (URG measurement) during this study.

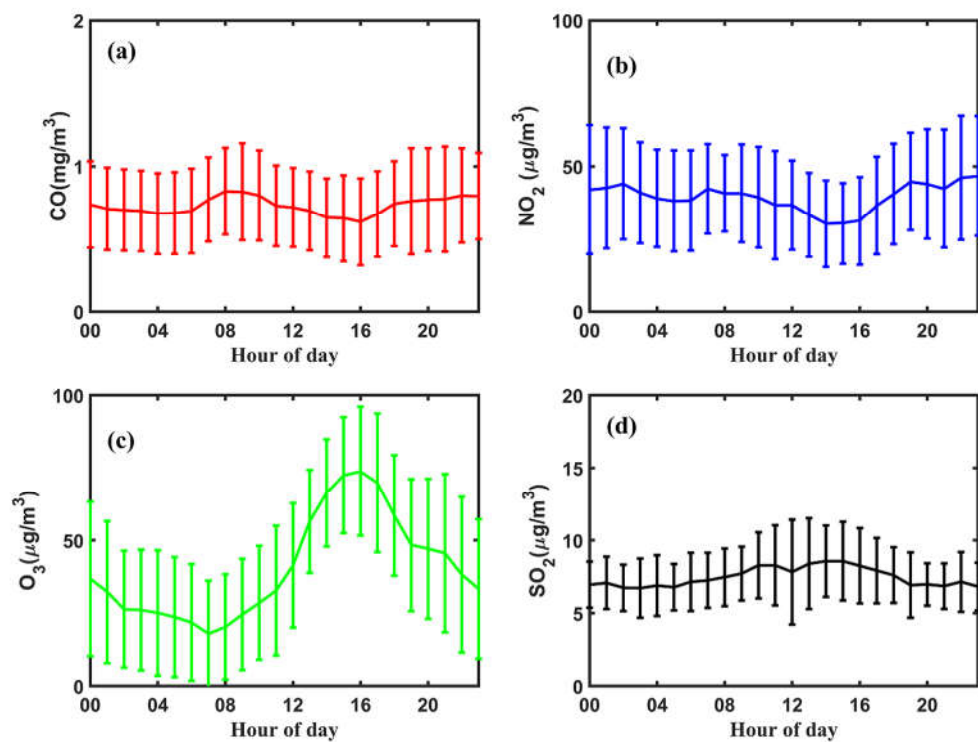

Figure S4. Diurnal variations in the concentrations of atmospheric trace gases: (a) CO, (b) NO<sub>2</sub>, (c) O<sub>3</sub>, and (d) SO<sub>2</sub>.
